# Supplementary material for: Direct fabrication of 3D silica-like microstructures from epoxy-functionalized polyhedral oligomeric silsesquioxane (POSS)
Source: Royal Society of Chemistry journal article supplement (doi:10.1039/b901226e), 2009-01-01
Supplement: b901226e.pdf [file b901226e.pdf]

## Supporting Information

### Direct fabrication of 3D silica-like microstructures from epoxy-functionalized polyhedral oligomeric silsesquioxane (POSS)

Jun Hyuk Moon,<sup>‡a</sup> Jin Seok Seo,<sup>‡b</sup> Yongan Xu<sup>b</sup> and Shu Yang<sup>\*b</sup>

<sup>a</sup> Department of Chemical and Biomolecular Engineering, Sogang University, 1 Shinsu-dong, Mapo-gu, Seoul (Korea)

<sup>b</sup> Materials Science and Engineering, University of Pennsylvania, PA, 19104 (USA)

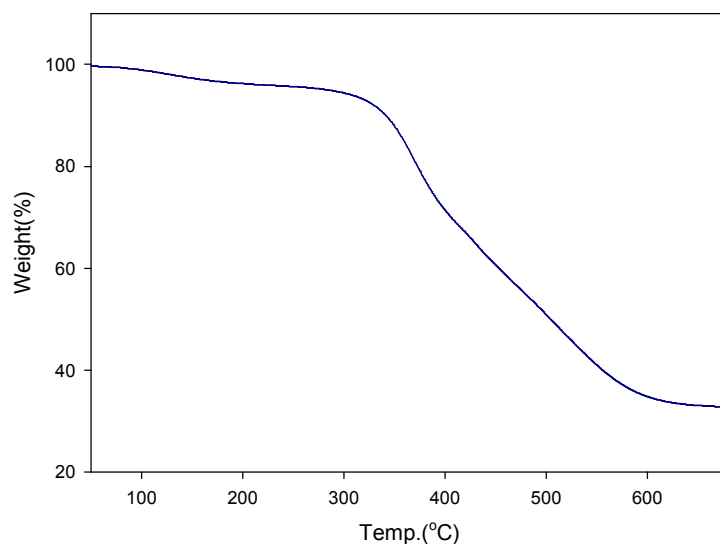

**Figure S1.** Thermogravimetric analysis of epoxy-POSS photoresist in air environment. The relative volume was measured by increasing the temperature up to 700 °C at a heating rate of 10 °C/min.
